# Supplementary material for: High-yield one-pot synthesis of polyrotaxanes with tunable well-defined threading ratios over a wide range
Source: Royal Society of Chemistry journal article supplement (doi:10.1039/d1ra09475k), 2022-01-01
Supplement: d1ra09475k1.pdf [file d1ra09475k1.pdf]

## Supporting information

### **High-yield one-pot synthesis of polyrotaxanes with tunable well-defined threading ratios over a wide range**

Takako Noritomi<sup>1, †</sup>, Lan Jiang<sup>1, †</sup>, Hideaki Yokoyama<sup>1</sup>,

Koichi Mayumi<sup>1, 2\*</sup>, and Kohzo Ito<sup>1\*</sup>

<sup>1</sup> Material Innovation Research Center (MIRC) and Department of Advanced Materials Science, Graduate School of Frontier Sciences, The University of Tokyo, 5-1-5 Kashiwanoha, Kashiwa, Chiba 277-8561, Japan.

<sup>2</sup> The Institute for Solid State Physics, The University of Tokyo, 5-1-5 Kashiwanoha, Kashiwa, Chiba 277-8581, Japan

<sup>†</sup>These authors contributed equally to this work

\*Correspondence: [kmayumi@g.ecc.u-tokyo.ac.jp](mailto:kmayumi@g.ecc.u-tokyo.ac.jp) (K.M.); [kohzo@edu.k.u-tokyo.ac.jp](mailto:kohzo@edu.k.u-tokyo.ac.jp) (K.I.); Tel.: +81-4-7136-3418 (K.M.); +81-4-7136-3756 (K.I.)

## NMR spectra of PR-hpCD

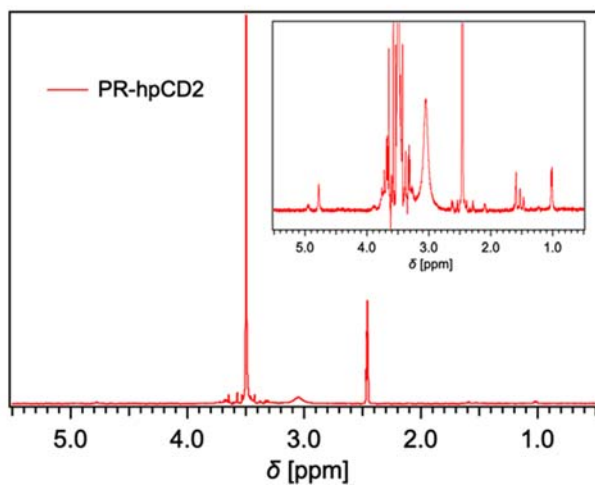

**Fig. S1.** <sup>1</sup>H NMR spectrum of PR-hpCD2.

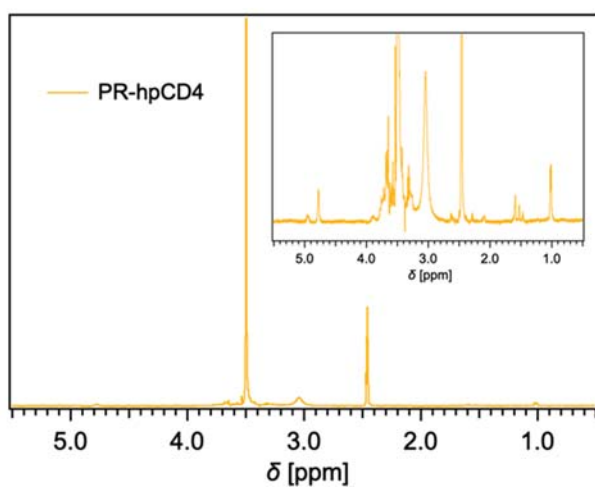

**Fig. S2.** <sup>1</sup>H NMR spectrum of PR-hpCD4.

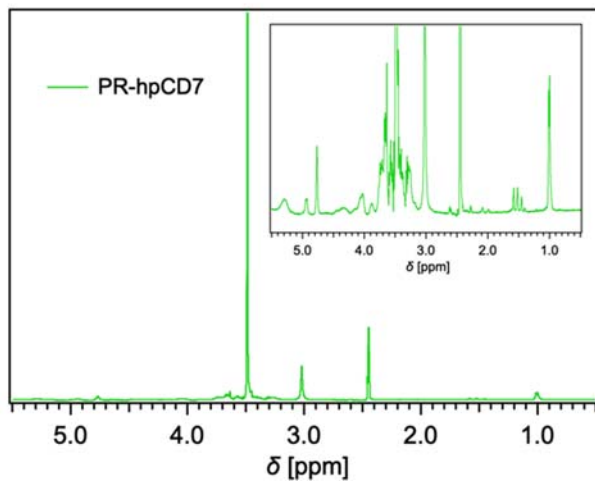

**Fig. S3.**  $^1\text{H}$ NMR spectrum of PR-hpCD7.

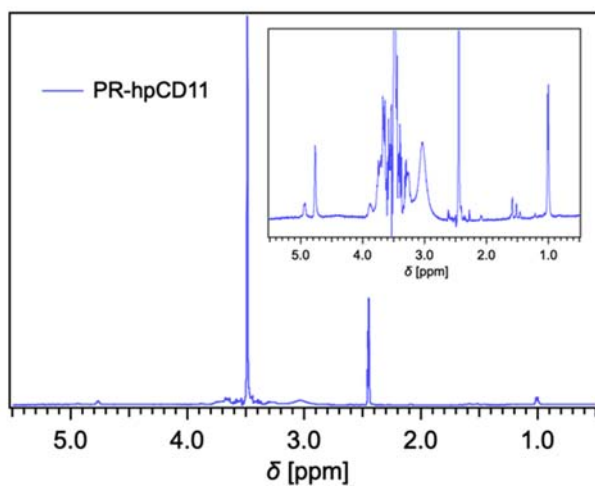

**Fig. S4.**  $^1\text{H}$ NMR spectrum of PR-hpCD11.

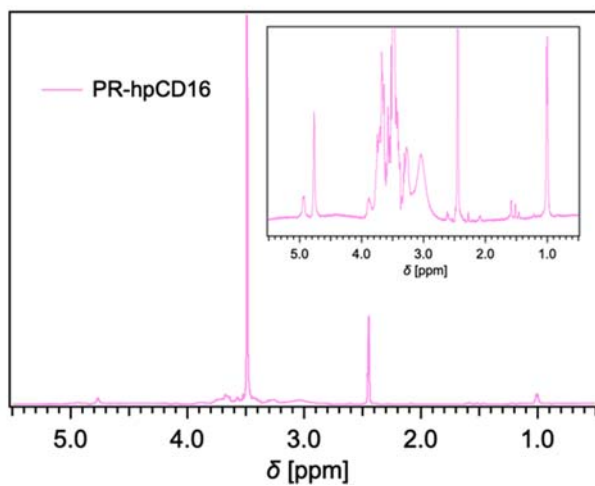

Fig. S5. <sup>1</sup>H NMR spectrum of PR-hpCD16.

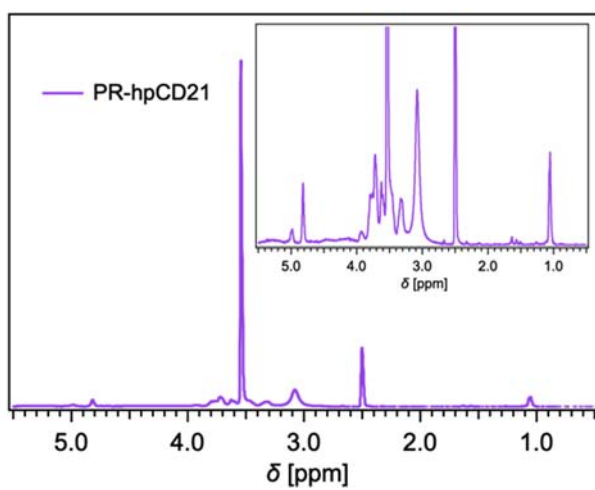

Fig. S6. <sup>1</sup>H NMR spectrum of PR-hpCD21.

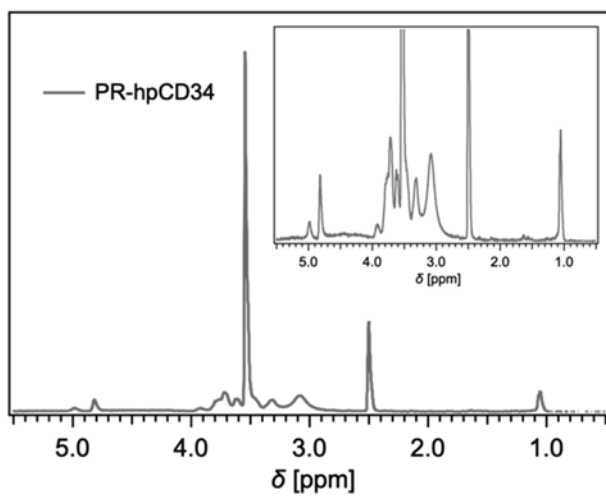

**Fig. S7.**  $^1\text{H}$ NMR spectrum of PR-hpCD34.

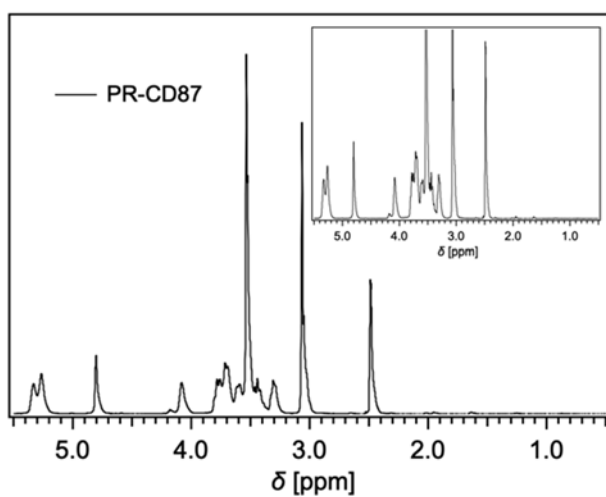

**Fig. S8.**  $^1\text{H}$ NMR spectrum of PR-CD87.

## **Thermogravimeter-Differential Thermal Analyzer (TG-DTA) measurement of PR-hpCD**

TG-DTA measurements were performed to evaluate the ratio of hpCD and PEG molecules in the PR samples using a Rigaku Thermo Plus EVO TG-DTA. The measurement temperature was controlled from room temperature to 773 K to measure the molecular content ratio (hpCD or CD : PEG) in each sample. hpCD or CD molecules and PEG in PR were detected at approximately 300 and 400 °C, respectively. Each molecular ratio for calculating the threading ratio was obtained from the weight change percentage by combustion.

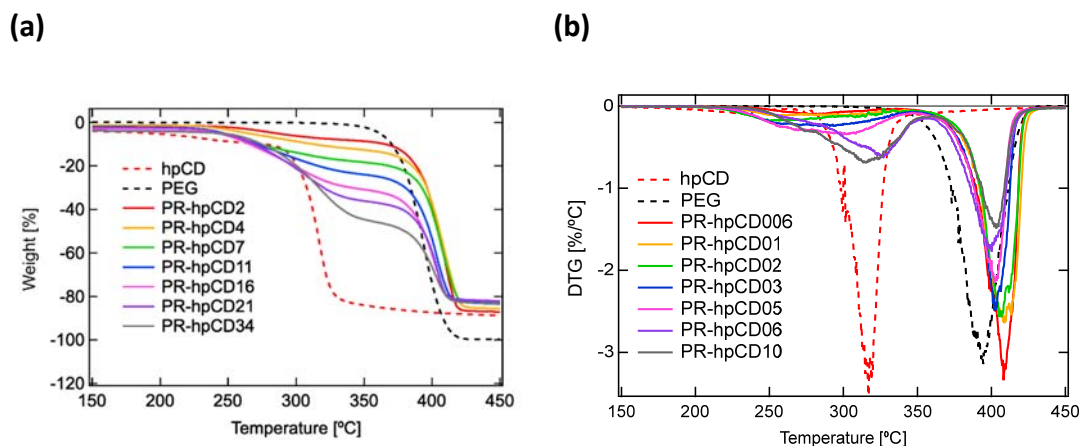

**Fig. S9.** TG-DTA curves for hpCD, PEG, and PR-hpPRs prepared at various hpCD concentrations.

**Table S1.** Comparison of threading ratios calculated from  $^1\text{H-NMR}$  and TG-DTA.

| Sample name | Calculated by $^1\text{H-NMR}$ |                      | Calculated by TG-DTA |                      |
|-------------|--------------------------------|----------------------|----------------------|----------------------|
|             | Threading ratio [%]            | Number of CD per PEG | Threading ratio [%]  | Number of CD per PEG |
| PR-hpCD2    | 0.64                           | 2.2                  | 0.62                 | 2.1                  |
| PR-hpCD4    | 1.09                           | 3.7                  | 1.09                 | 3.7                  |
| PR-hpCD7    | 2.05                           | 7.0                  | 1.82                 | 6.2                  |
| PR-hpCD11   | 3.09                           | 10.5                 | 2.74                 | 9.3                  |
| PR-hpCD16   | 4.81                           | 16.4                 | 4.06                 | 13.8                 |
| PR-hpCD21   | 6.03                           | 20.6                 | 5.05                 | 17.2                 |
| PR-hpCD34   | 10.0                           | 34.2                 | 8.43                 | 28.7                 |

## Synthesis of PR-hpCD at various PEG concentrations

**Table S2.** Synthesis of PR-hpCD at various PEG concentrations

| hpCD [mol/L] | PEG ( $\times 10^{-3}$ ) [mol/L] | Threading ratio [%] | Number of hpCD per PEG $N_{CD}$ | $M_w$ [ $\times 10^4$ ] | $M_n$ [ $\times 10^4$ ] | $M_w/M_n$ | Yield [%] |
|--------------|----------------------------------|---------------------|---------------------------------|-------------------------|-------------------------|-----------|-----------|
| 0.44         | 1.1                              | 5.49                | 18.7                            | 5.46                    | 5.07                    | 1.08      | 75.9      |
| 0.44         | 2.3                              | 4.27                | 14.6                            | 4.78                    | 5.18                    | 1.08      | 93.0      |
| 0.44         | 4.5                              | 4.81                | 16.4                            | 5.04                    | 4.68                    | 1.08      | 98.9      |

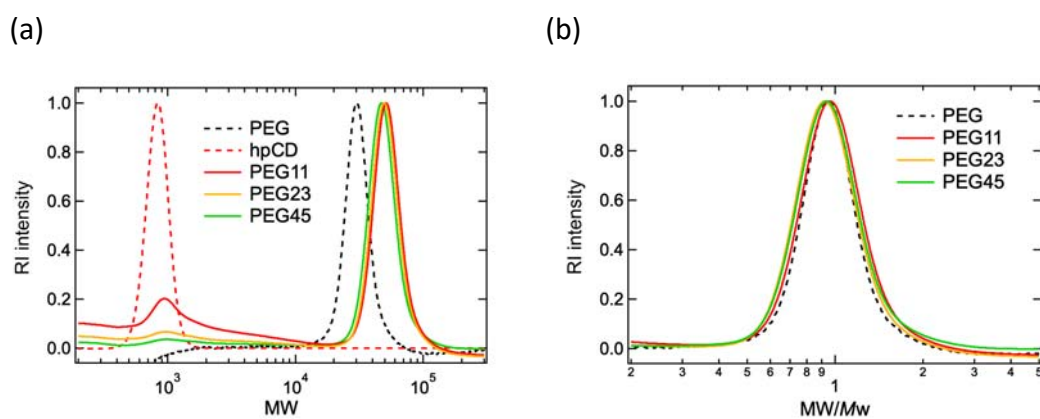

**Fig. S10.** Distribution of (a) molecular weight MW and (b) MW normalized by average molecular weight  $M_w$  for PEG and PR-hpCDs prepared at various PEG concentrations.



## Synthesis of PR-hpCD at various temperatures

**Table S3.** Synthesis of PR-hpCD at various temperatures.

| Temperature [K] | Threading ratio [%] | Number of hpCD per PEG | $M_w$ [ $\cdot 10^4$ ] | $M_n$ [ $\cdot 10^4$ ] | $M_w/M_n$ | Yield [%] |
|-----------------|---------------------|------------------------|------------------------|------------------------|-----------|-----------|
| 277             | 4.81                | 16.4                   | 5.04                   | 4.68                   | 1.08      | 98.9      |
| 298             | 5.20                | 17.7                   | 5.19                   | 4.83                   | 1.08      | 91.5      |
| 333             | 5.81                | 19.8                   | 5.01                   | 4.66                   | 1.08      | 88.6      |
| 353             | 5.46                | 18.6                   | 5.46                   | 4.78                   | 1.08      | 96.7      |

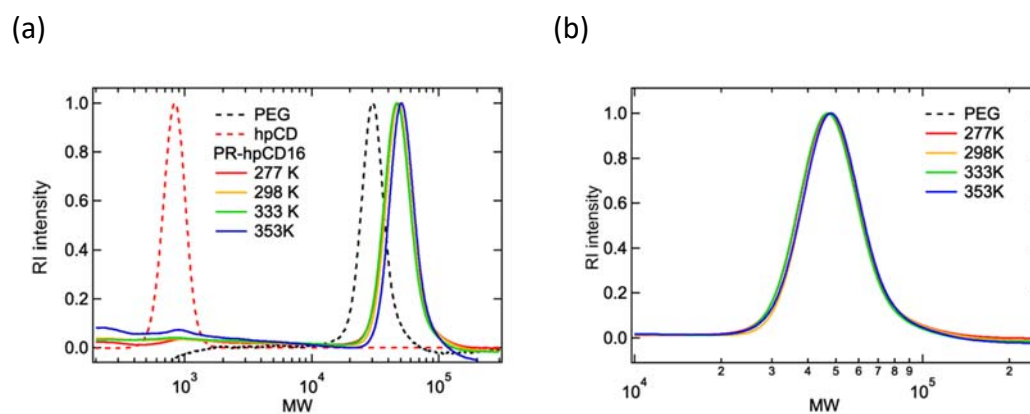

**Fig. S11.** Distribution of (a) molecular weight MW and (b) MW normalized by average molecular weight  $M_w$  for PEG and PR-hpCDs prepared at various temperatures.

## SAXS and WAXS profiles of hpCD and pPR-hpCD solutions

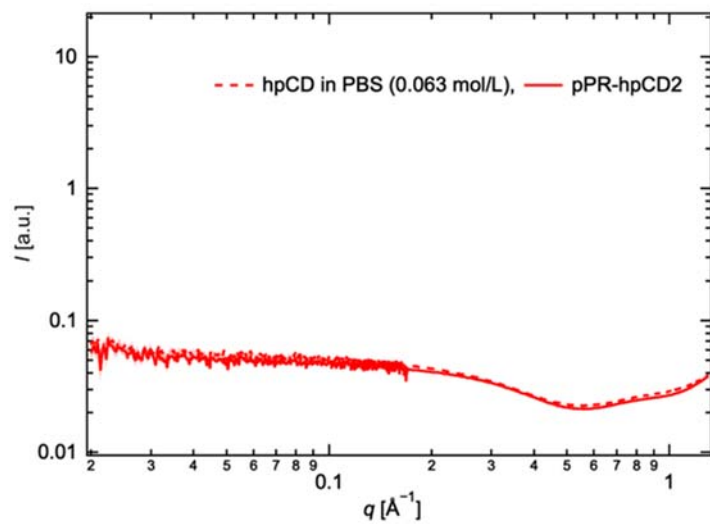

**Fig. S12.** X-ray scattering profile of hpCD and pPR-hpCD2.

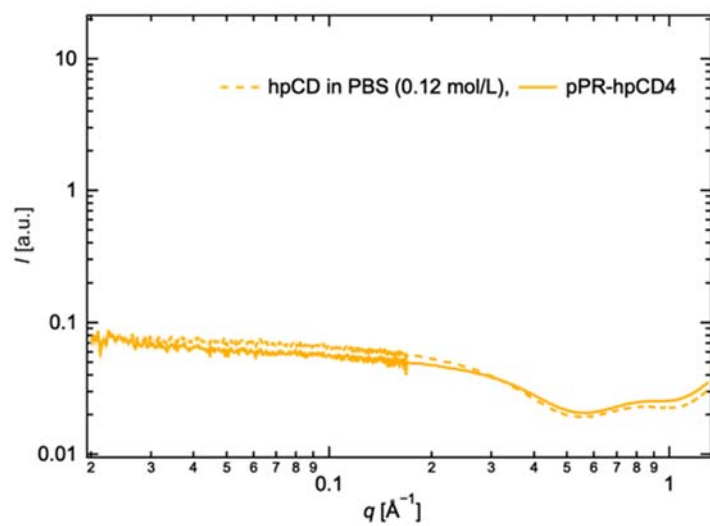

**Fig. S13.** X-ray scattering profile of hpCD and pPR-hpCD4.

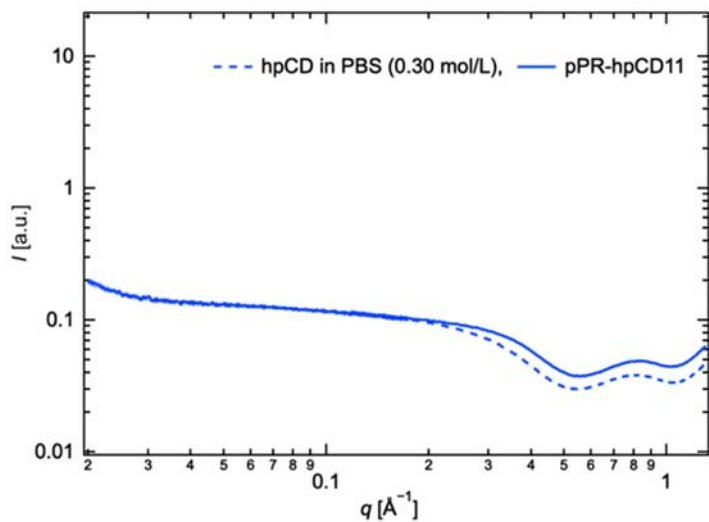

**Fig. S14.** X-ray scattering profile of hpCD and pPR-hpCD11.

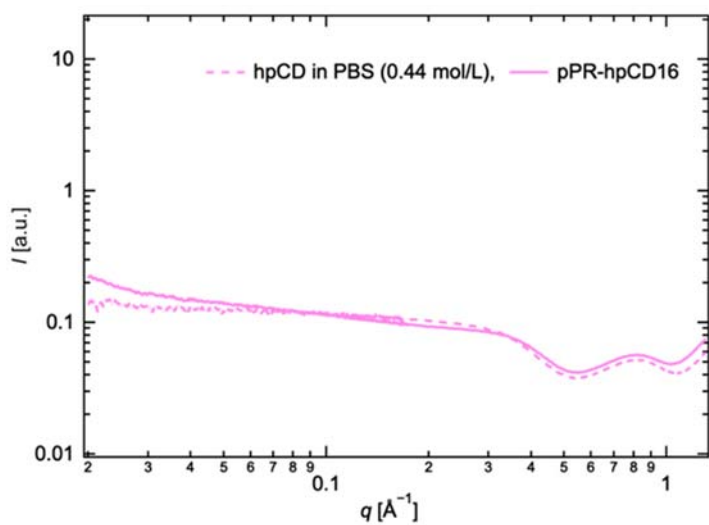

**Fig. S15.** X-ray scattering profile of hpCD and pPR-hpCD16.

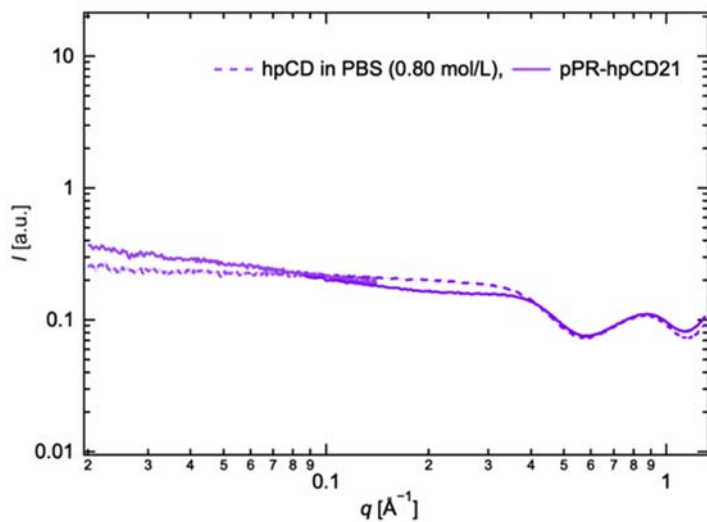

**Fig. S16.** X-ray scattering profile of hpCD and pPR-hpCD21.

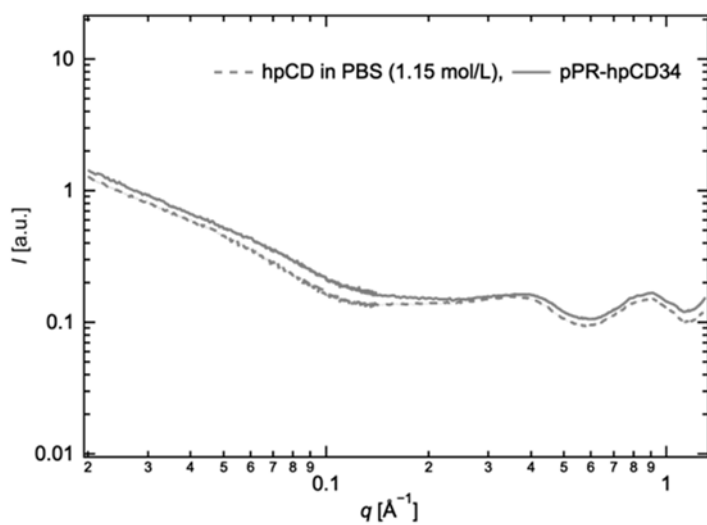

**Fig. S17.** X-ray scattering profile of hpCD and pPR-hpCD34.

### **SANS measurements of PR-hpCD solution**

Small-angle neutron scattering (SANS) measurements on PEG and PR-hpCD solutions were performed using the SANS-U spectrometer of the Institute for Solid State Physics, the University of Tokyo, located at the JRR-3M research reactor of Japan Atomic Energy Agency in Tokai, Japan. For the SANS experiments, PEG and PR-hpCD were dissolved in D<sub>2</sub>O with the concentration of 1 wt%. The neutron wavelength was 7.0 Å, and the sample-to-detector distances were 8 and 1 m. After the subtraction of background and cell scattering, the scattered intensity was normalized to the absolute intensity. The corrected 2-dimensional scattering pattern was converted to 1-dimensional scattering profile,  $I(q)$  vs  $q$  by circular averaging, followed by incoherent scattering subtraction. The temperature of the sample was set to be 25 °C.

Fig. S.18 shows the SANS profiles of the PEG and PR-hpCD solutions. All the scattering profiles of PR-hpCDs with various threading ratios were overlapped with each other and close to that of PEG. This suggests that the conformation of PR-hpCD does not change with the threading ratio in the range from 0.7% to 10% ( $N_{CD} = 2$  to 11).

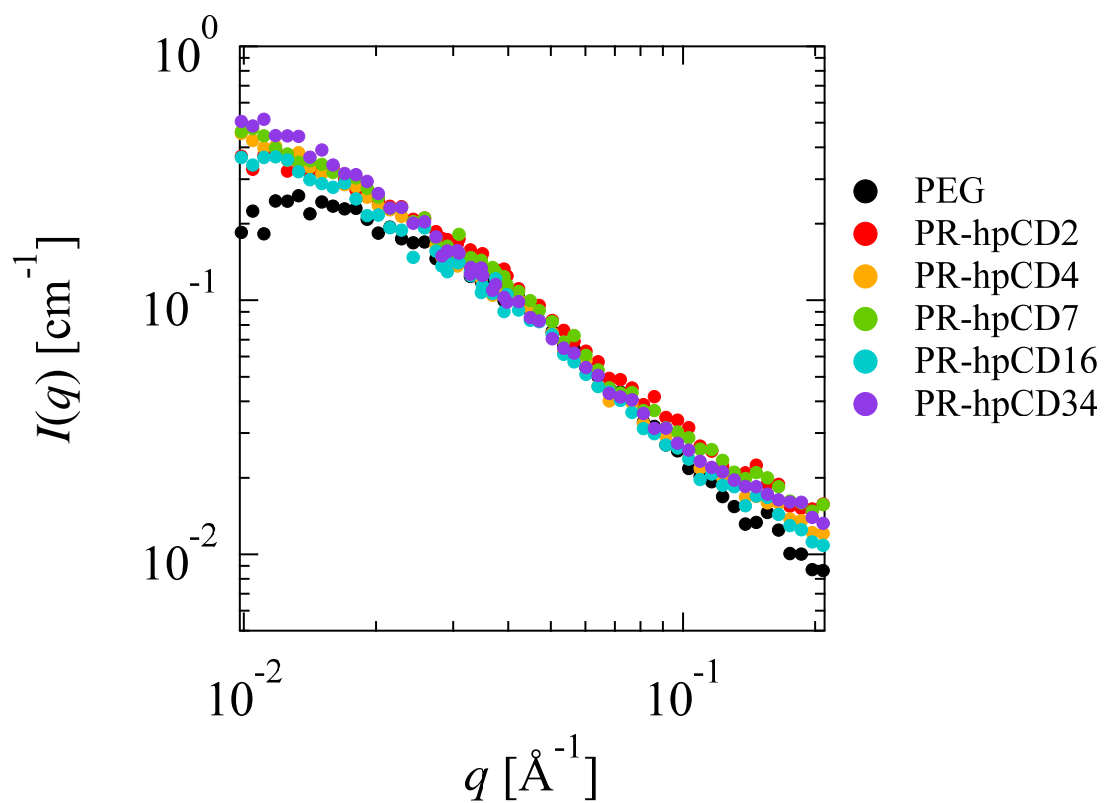

**Fig. S18.** SANS profiles of PEG and PR-hpCD.
